# Supplementary material for: Extracorporeal Membrane Oxygenation for SARS-CoV-2 Acute Respiratory Distress Syndrome: A Retrospective Study From Hubei, China
Source: PubMed Central journal article supplement (PMC7835137; doi:10.3389/fmed.2020.611460), 2021-01-12
Supplement: Table_1.pdf [file Table_1.pdf]

Supplementary Table 1. Analgesics, sedatives, and paralytics used during the treatment with ECMO in 73 ARDS patients with COVID-19

| Medications     | All patients (n = 73) |
|-----------------|-----------------------|
| Analgesics      |                       |
| Fentanyl        | 12 (16.4%)            |
| Sulfentanyl     | 32 (43.8%)            |
| Remifentanyl    | 45 (61.6%)            |
| Morphine        | 10 (13.7%)            |
| Dolantin        | 1 (1.4%)              |
| Butorphanol     | 26 (35.6%)            |
| Nalbuphine      | 2 (2.7%)              |
| Sedatives       |                       |
| Midazolam       | 70 (95.9%)            |
| Propofol        | 37 (50.7%)            |
| Dexmedetomidine | 42 (57.5%)            |
| Promethazine    | 2 (2.7%)              |
| Paralytics      |                       |
| Vecuronium      | 4 (5.5%)              |
| Rocuronium      | 27 (37.0%)            |
| Atracurium      | 25 (34.2%)            |
| Cisatracurium   | 11 (15.1%)            |

Abbreviations: ECMO, extracorporeal membrane oxygenation; ARDS, acute respiratory distress syndrome; COVID-19, coronavirus disease 2019.
